# Supplementary material for: An ISFET Microarray Sensor System for Detecting the DNA Base Pairing
Source: MDPI journal article supplement (doi:10.3390/mi12070731), 2021-06-22
Supplement: s1 [file s1]

# Supplementary Information: An ISFET Microarray Sensor System for Detecting the DNA Base Pairing

Peng Sun <sup>1</sup>, Yongxin Cong <sup>1</sup>, Ming Xu <sup>1</sup>, Huaqing Si <sup>1</sup>, Dan Zhao <sup>2</sup> and Dongping Wu <sup>1,\*</sup>

<sup>1</sup> State Key Laboratory of ASIC and System, School of Microelectronics, Fudan University, Shanghai 200433, China; 18112020068@fudan.edu.cn (P.S.); 15210720050@fudan.edu.cn (Y.C.); xuming123@263.net (M.X.); 17112020035@fudan.edu.cn (H.S.)

<sup>2</sup> Shanghai Turtle Technology Company Limited, Shanghai 200439, China; zhaodan@fudan.edu.cn

\* Correspondence: dongpingwu@fudan.edu.cn

The reference electrode (RE), such as the widely used Ag/AgCl redox-couple electrode, is both hard to maintain and difficult to integrate as a constituent of an on-chip sensing system. This work demonstrates a microfluidic based on gold or platinum as a metal electrode that can provide a stable reference potential for ISFET-based biochemical sensors. As shown in Fig. S1, the metal electrode is fixed to the microfluidic module. A rubber washer is placed under the metal electrode to ensure that the metal electrode is placed inside the flow system without solution leakage.

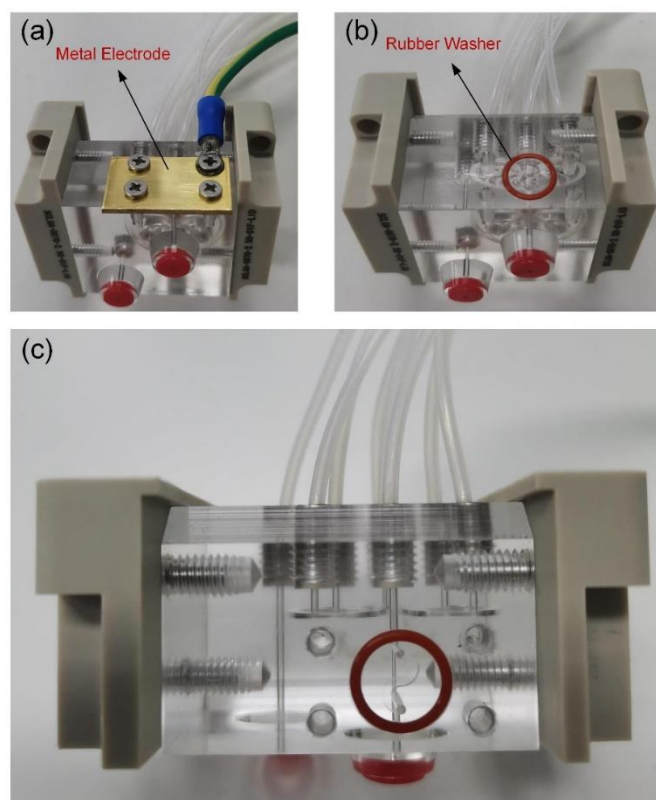

**Figure S1.** Physical diagram of microfluidic system. (a) The metal electrode is fixed to the microfluidic module. (b,c) A rubber washer is placed under the metal electrode to ensure that the metal electrode is placed inside the flow system without solution leakage.
